# Supplementary material
Source: PubMed Central journal article supplement (PMC1764822)
Supplement: NIHMS12658-supplement-Stable1.pdf [file NIHMS12658-supplement-Stable1.pdf]

**Supplementary Table 1**

| Primer                     | Sequence                                                                     |
|----------------------------|------------------------------------------------------------------------------|
| P-selectin forward         | 5'CCGCCCCATTGACGCAAATGGGCGGTAGGCG3'                                          |
| P-selectin reverse         | 5'GGGGCTGGGGCTGTCCATACCCCGAGGC3'                                             |
| Q30N/K32T sense            | 5'CGCTACACAGACTTAGTGGCCATCA <u>AATAATA</u> CAAATGA<br>AATTGATTACCTCAATAAGG3' |
| Q30N/K32T antisense        | 5'CCTTATTGAGGTAATCAATTTCA <u>TTGTATTATT</u> GATGGC<br>CACTAAGTCTGTGTAGCG3'   |
| L-selectin forward         | 5'GGCTAACTAGAGAACCCACTGCTTACTGGCTTATCG3'                                     |
| L-selectin reverse         | 5'GCCATCTTTATATTCCACATGAATCCTTTCCC3'                                         |
| L-selectin/N138G sense     | 5'GGAGAATGTGTAGAAATCATC <u>GGT</u> AATTACACCTGCAA<br>CTGTGATGTGGGG3'         |
| L-selectin/N138G antisense | 5'CCCCACATCACAGTTGCAGGTGTAATT <u>ACCGATGAT</u> TTC<br>TACACATTCTCC3'         |
| LPL/G138N sense            | 5'GCCTCGAGACCATCA <u>AATA</u> ACTACACCTGCTCC3'                               |
| LPL/G138N antisense        | 5'GGAGCAGGTGTAGTT <u>ATT</u> GATGGTCTCGAGGC3'                                |

**Supplementary Table 1** Primers were used in PCR-based mutagenesis to generate the various P-selectin and L-selectin variants. Mutated codons are underlined.
